# Supplementary material for: Development and validation of a real-time AI model for differentiating benign and malignant gastric ulcers: A multicenter retrospective study
Source: Research Square preprint supplement (doi:10.21203/rs.3.rs-8776954/v1), 2026-02-17
Supplement: Supplementary file 1 [file 152e320f751439785151760e.docx]

**Appendix**

Table S1 Image data distribution from each participating hospital

| Number of images(number of patients) | Center1 | Center2 | Center3 | Center4 | Whole dataset |
| --- | --- | --- | --- | --- | --- |
| Benign ulcer | 1456（495） | 1484（272） | 4806（668） | 517（143） | 8263（1578） |
| Malignant ulcer | 480（140） | 239（25） | 724（96） | 8（2） | 1451（263） |
| Background | 10353（187） | / | / | / | 10353（187） |
| Overall | 12289（822） | 1723（297） | 5530（764） | 525（145） | 20067（2028） |

Center1:The Second Affiliated Hospital of Chongqing Medical University；Center2：The Chongqing University Three Gorges Hospital;Center3:the People's Hospital of Kaizhou District;Center4:Chongqing and The Third People’s Hospital of Chengdu

Table S2 Video data distribution

| Number of images(numb-er of patients) | Benign ulcer | Malignant ulcer | Background | Whole dataset |
| --- | --- | --- | --- | --- |
|  | 1557/7 | 276/3 | 5438/11 | 7271/11 |

Figure S1 Overview of the AI model conceptual framework


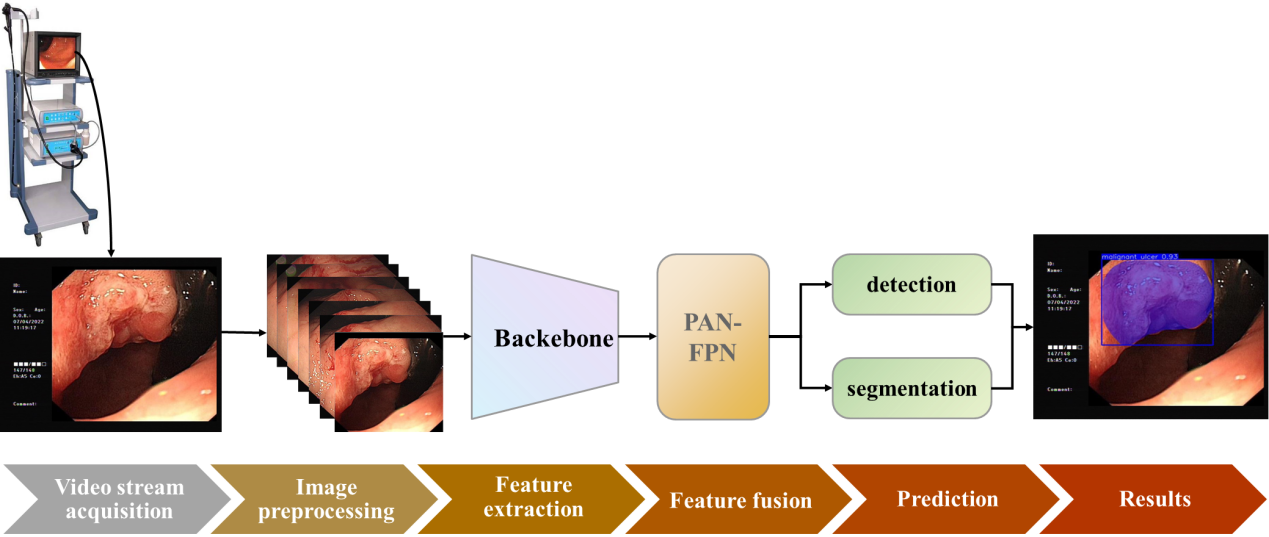


PAN-FPN: Path Aggregation Network and Feature Pyramid Networks

a. the model construction primarily involves the following steps: video and image acquisition, image preprocessing, feature extraction, multi-scale feature fusion, model inference and result prediction, and result output.

b. To mitigate the impact of illumination variations, a designed illumination attention module is incorporated into the original YOLOv8 architecture. The overall model structure is illustrated in Figure b.


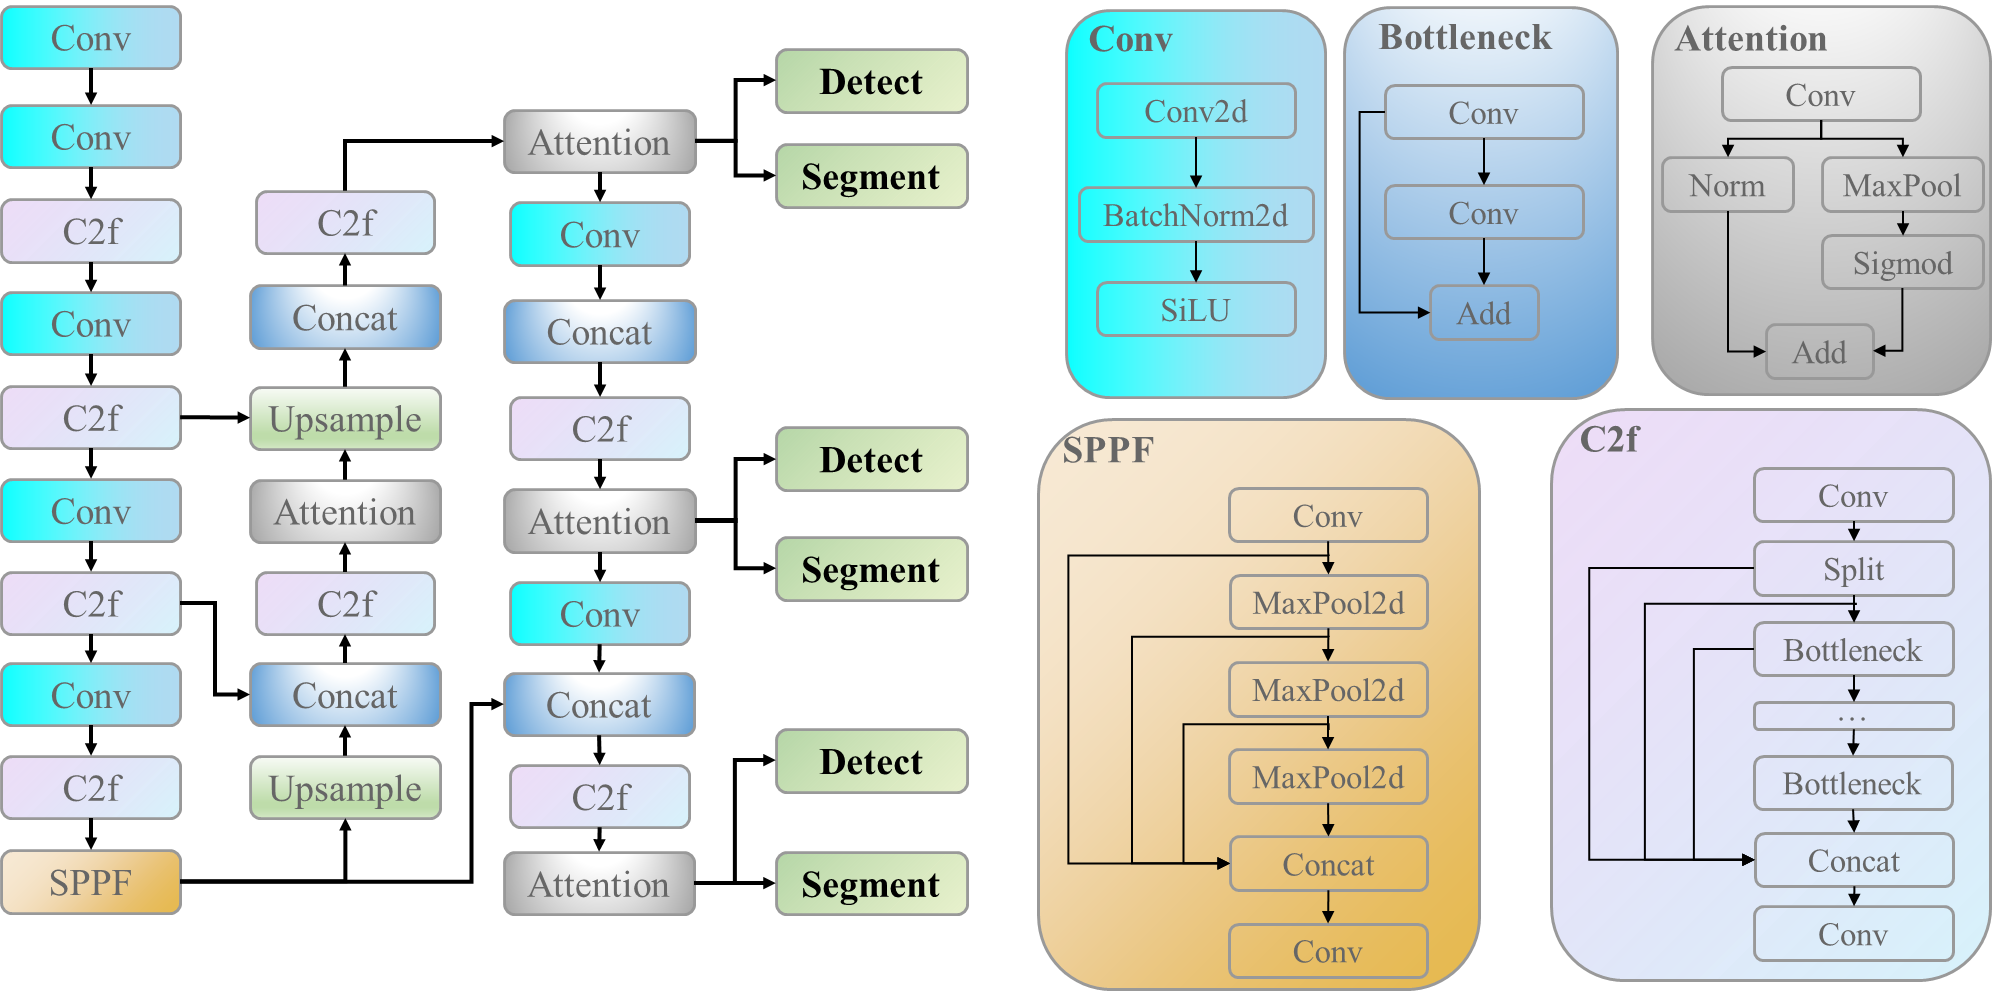


Conv, convolutional layer. C2f, CSP bottleneck with 2 convolutions. SPPF, Spatial Pyramid Pooling Fast. Conv2d, two-dimensional convolutional layer. BatchNorm2d, two-dimensional batch normalization layer. SiLU, Sigmoid-Weighted Linear Unit. MaxPool2d, max pooling layer. Sigmod, Sigmoid function. Add, elementwise addition layer. Upsample, upsample layer. Concat, concatenate layer. Split, dimensional split layer. Detect, detection head. Segment, segmentation head. Attention, attention layer.

Specifically, the illumination attention module normalizes the features extracted by the network to reduce the influence of illumination.

Within illumination attention module, channel normalization is first applied to the extracted features to obtain refined representations. The normalization is computed as follows:

where denotes the normalized feature, and represent the mean and variance of the original feature, respectively, and and correspond to the transformed mean and variance, which are adjusted during the model training process.

Subsequently, a differentiable gating module is employed to efficiently select between the original features and the normalized features along the channel dimension. A series of binary indicators are obtained through pooling and normalization functions. The specific computation is formulated as follows:

where denotes the pooled feature; represents the gating channel selection vector; is a small positive constant introduced to prevent division by zero; and refers to the pooling function, for which the max-pooling operation is adopted.

Finally, channel selection is utilized to fuse the original backbone features with the normalized features. The fusion rule is formulated as follows:

where denotes the fused feature, and indicates channel-wise multiplication.

Figure S2 Training results of the improved the model.


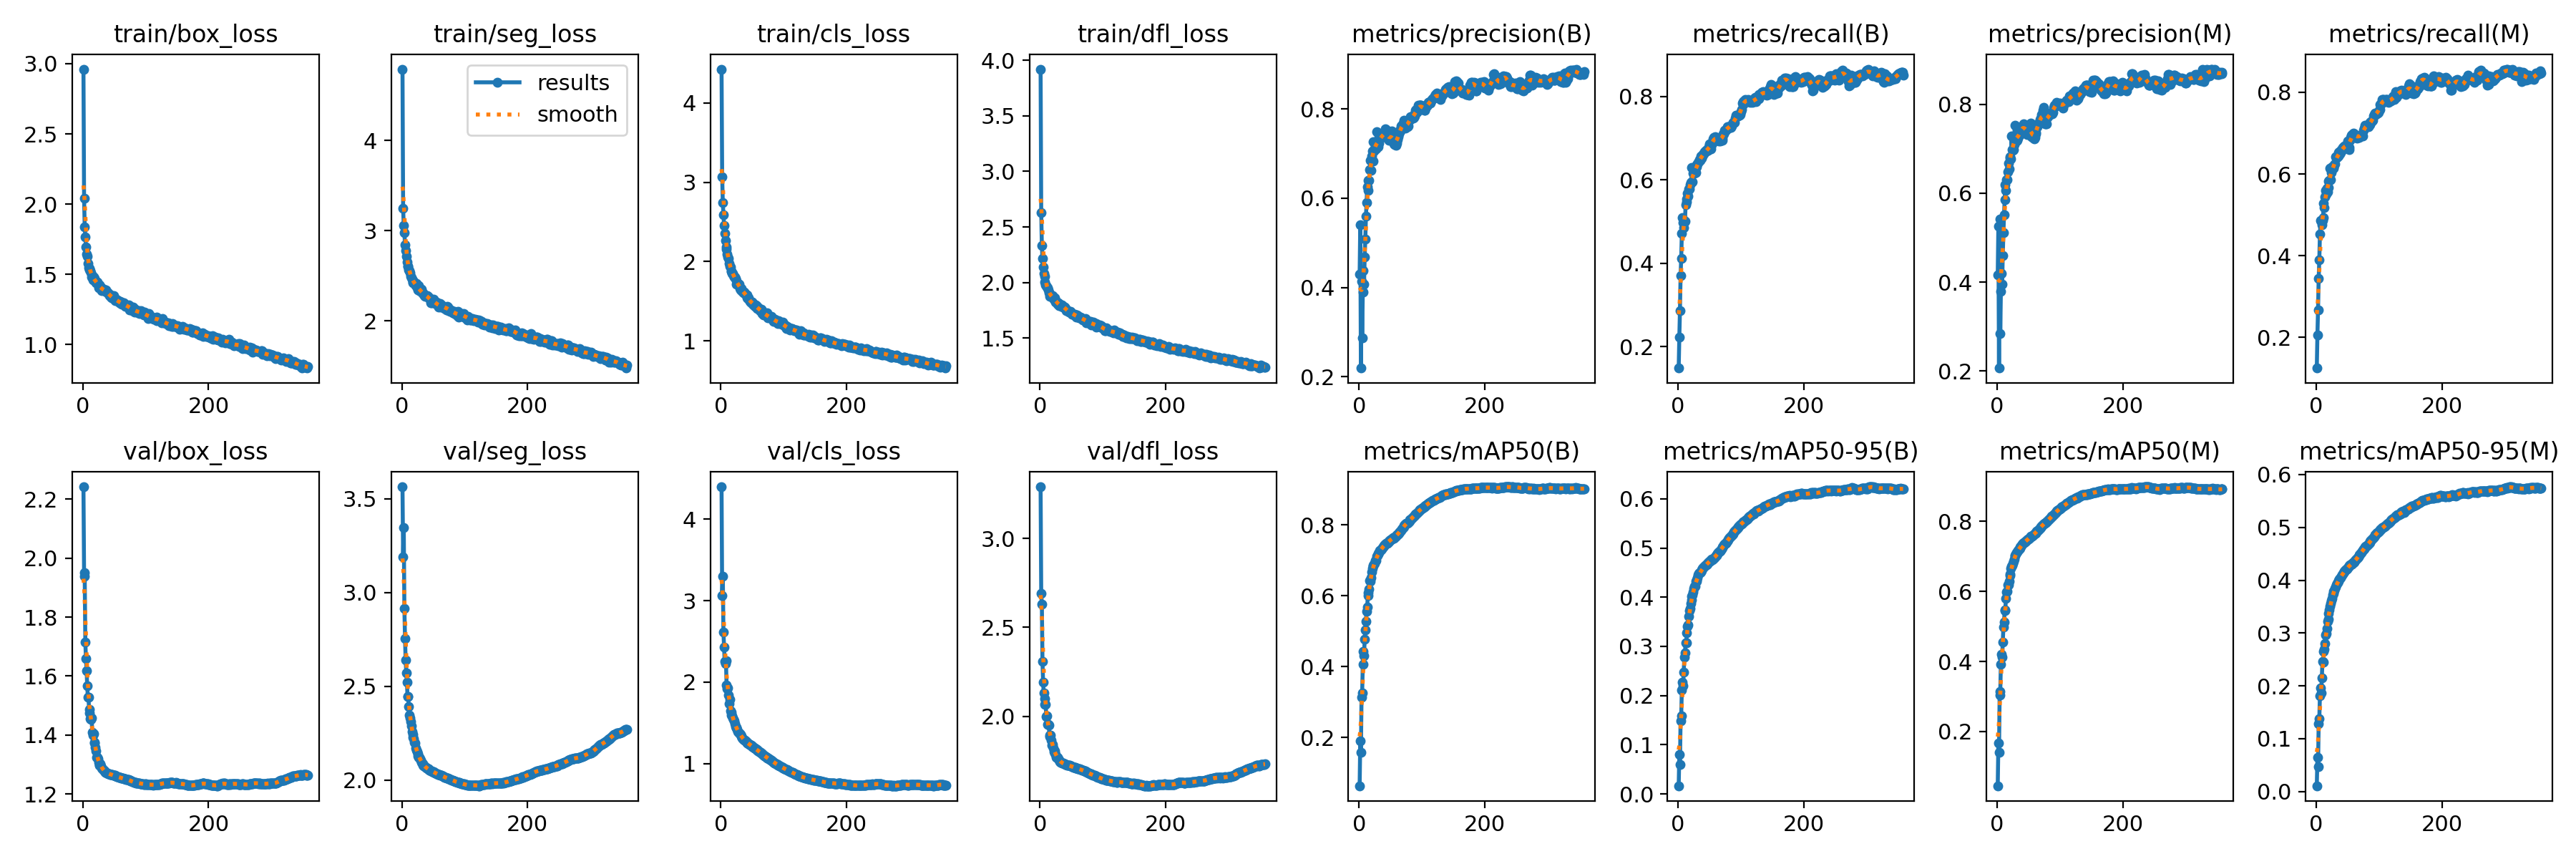


The bounding box localization loss, category classification loss, segmentation loss, and distribution focal loss gradually decrease with increasing iterations on the training set, while on the validation set, each type of loss tends to stabilize after about 300 iterations.

Figure S3 Interpretability of the model

Using heat maps to provide interpretability of artificial intelligence. The highlighted areas in the image indicate the regions that the artificial intelligence pays more attention and the image above is the original endoscopic image, and the corresponding image below is a heat map.We each listed three examples of benign and malignant ulcers.

| benign ulcers |  |  |
| --- | --- | --- |
| 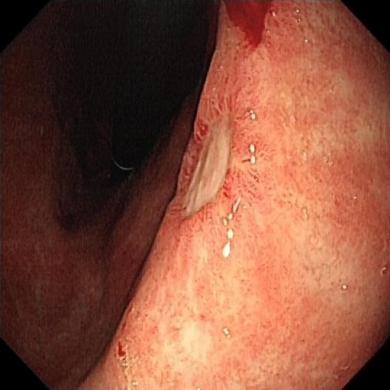 | 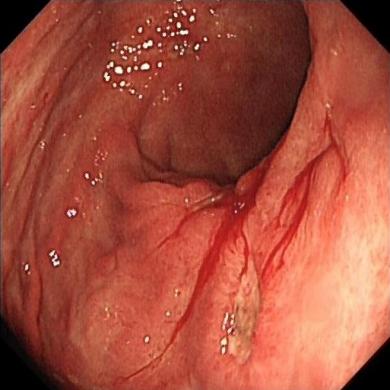 | 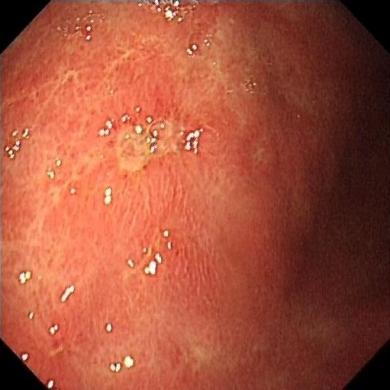 |
| 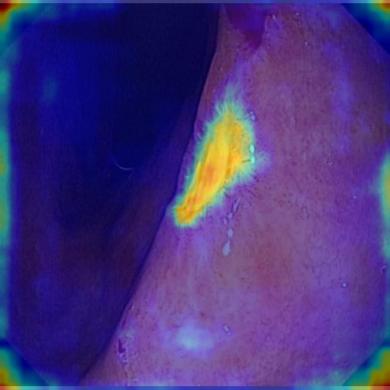 | 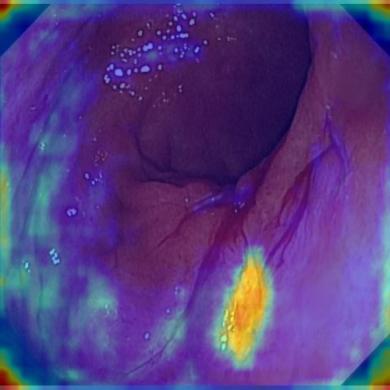 | 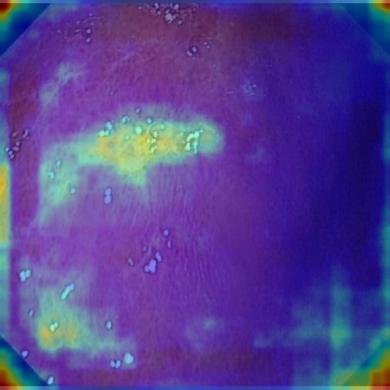 |
| Malignant ulcers |  |  |
| 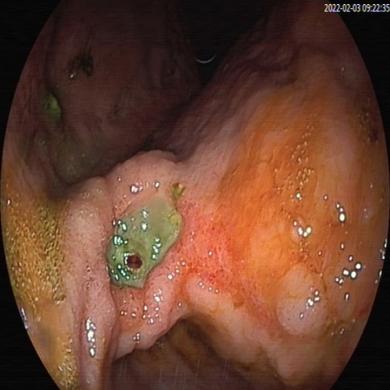 | 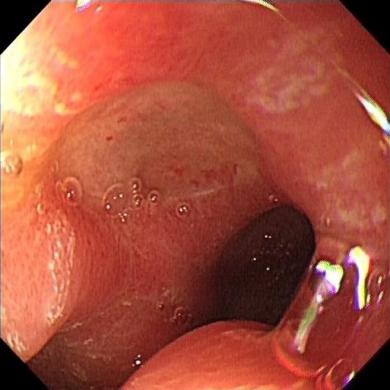 | 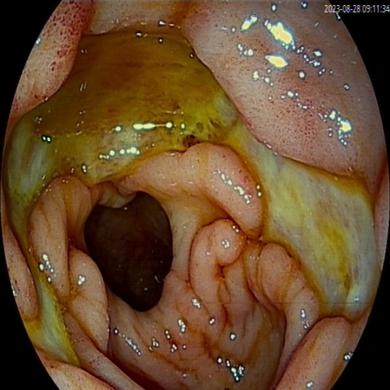 |
| 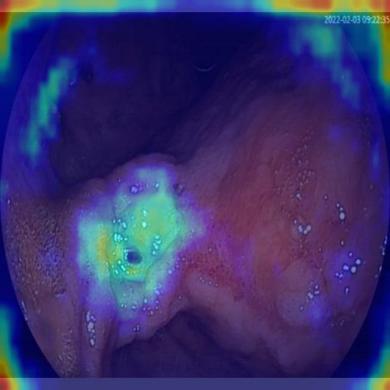 | 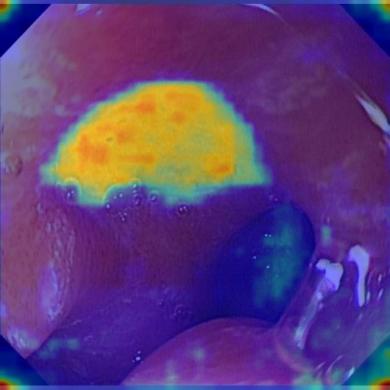 | 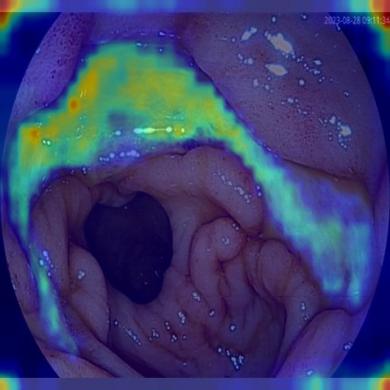 |
